# Supplementary material
Source: PubMed Central journal article supplement (PMC3842872)
Supplement: Supp_Table1.pdf [file Supp_Table1.pdf]

SUPPLEMENTARY TABLE S1. PRIMERS USED FOR qPCR ANALYSIS OF GENE EXPRESSION IN ZFB1 CELLS

| <i>Gene name (acronym)</i>                                                        | <i>GenBank accession number</i> | <i>Sequence</i>                                                    |
|-----------------------------------------------------------------------------------|---------------------------------|--------------------------------------------------------------------|
| Runt-related transcription factor 2 ( <i>runx2</i> )                              | AY508964                        | FW: AGCCGACCCACGCCAGTTTGAG<br>RV: TGGGGTGTAGGTGAATGTTGCTGGATA      |
| Osterix ( <i>osx</i> )                                                            | AY380818                        | FW: AGCCTCGCATCTGAAAGCCAC<br>RV: GTTTTCTGGTGTGTTGCTGAGGTGGTC       |
| Osteopontin ( <i>spp1</i> )                                                       | AY241929                        | FW: GAGCCTACACAGACCACGCCAACAG<br>RV: GGTAGCCCAAACCTGTCTCCCCG       |
| Osteonectin ( <i>sparc</i> )                                                      | BK005113.1                      | FW: CTTCTTCCTGTTCTGCCTCGCTGG<br>RV: TCTCAGCAATAACATCCTCCACGACCA    |
| Eukaryotic translation elongation factor 1<br>alpha 1, like 1 ( <i>eef1a1l1</i> ) | NM_131263                       | FW: ACGCCCTCCTGGCTTTCACCC<br>RV: TGGGACGAAGGCAACACTGGC             |
| Sex determining region Y (SRY) box<br>containing gene 9a ( <i>sox9a</i> )         | NM_131643                       | FW: CGCCCACTCCTCCCACCACC<br>RV: GACCGTTCGGCGGGAGGTATTG             |
| Collagen type II, alpha 1 ( <i>col2a1</i> )                                       | DQ335127                        | FW: AAGCACTCCTAAAATCCCACGCAA<br>RV: CTCAGTAGACAGCAGCCTGAGGAAGTT    |
| Collagen type X, alpha 1 ( <i>col10a1</i> )                                       | NM_001083827                    | FW: AATGGTGTCTTTGCTGCCGATAATGTC<br>RV: CCACTGCTTGGCATTTC AAGTTGAGA |
| Alkaline phosphatase ( <i>alp</i> )                                               | NM_201007                       | FW: TTCCTCTGCGGTGTCAAAGCCAA<br>RV: AAGCAGCACTCGGGGTGGCAT           |
